# Supplementary material for: Graphene–polydopamine–C60nanohybrid: an efficient protective agent for NO-induced cytotoxicity in rat pheochromocytoma cells
Source: Royal Society of Chemistry journal article supplement (doi:10.1039/c4tb01446d), 2014-10-15
Supplement: c4tb01446d1.pdf [file c4tb01446d1.pdf]

## Electronic Supplementary Information

# Graphene-polydopamine-C<sub>60</sub> nanohybrid: an efficient cytoprotective agent for NO-induced cytotoxicity in rat pheochromocytoma cells

Zhen Hu <sup>a, b\*</sup>, Yudong Huang <sup>a\*</sup>, Chunhua Zhang <sup>a</sup>, Li Liu <sup>a</sup>, Jun Li <sup>a</sup>, Yafei Wang <sup>a</sup>

<sup>a</sup> School of Chemical Engineering and Technology, State Key Laboratory of Urban Water Resource and Environment, Harbin Institute of Technology, Harbin 150001, China.

<sup>b</sup> Department of Chemistry, Chemistry Research Laboratory, 12 Mansfield Road, University of Oxford, Oxford. OX1 3TA, UK

E-mail address: yudonghuang@163.com (Yudong Huang), huzhen@hit.edu.cn (Zhen Hu)

Tel.: +86-451-86413711 Fax: +86-451-86402403.

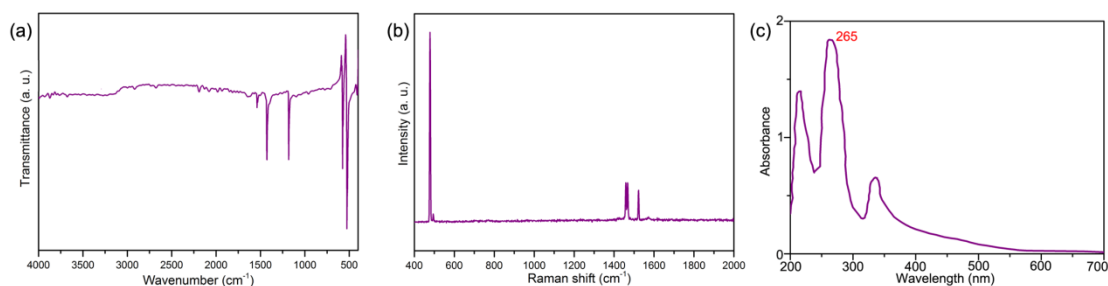

**Fig. S1** (a) FT-IR spectra of C<sub>60</sub>; (b) Raman spectra of C<sub>60</sub>; (c) UV-Vis spectra of C<sub>60</sub>.

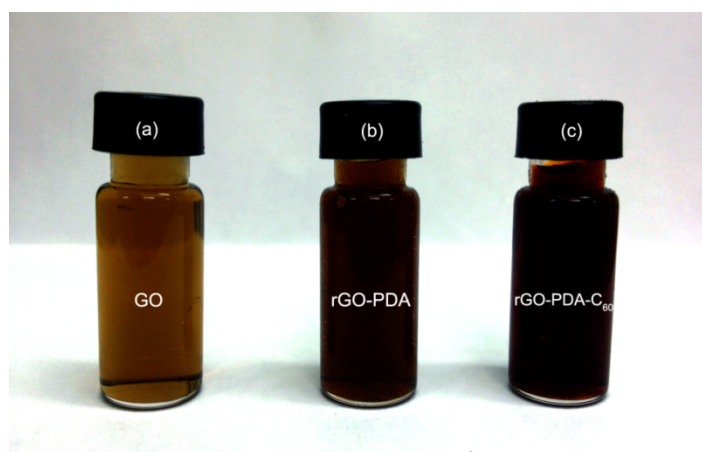

**Fig. S2** Photograph of aqueous dispersions GO, rGO-PDA, and rGO-PDA-C<sub>60</sub> (50 µg/mL) after 3 days.

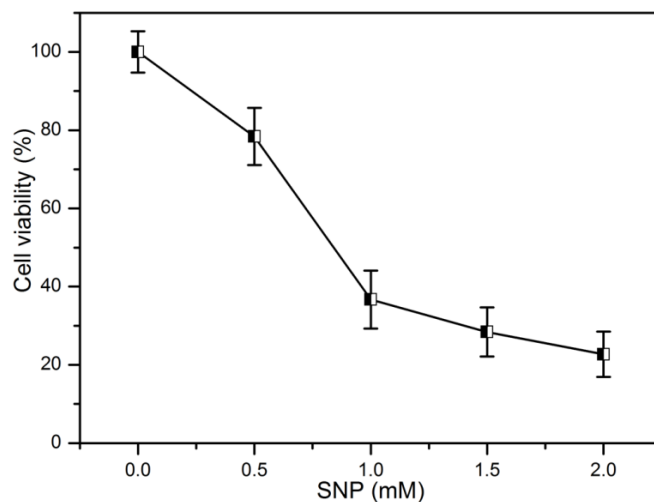

**Fig. S3** The dependent of the cell viability on the concentration of SNP. Cell viability was measured by the conventional MTT reduction assay. Data were presented as mean  $\pm$  S.D. (n=3).

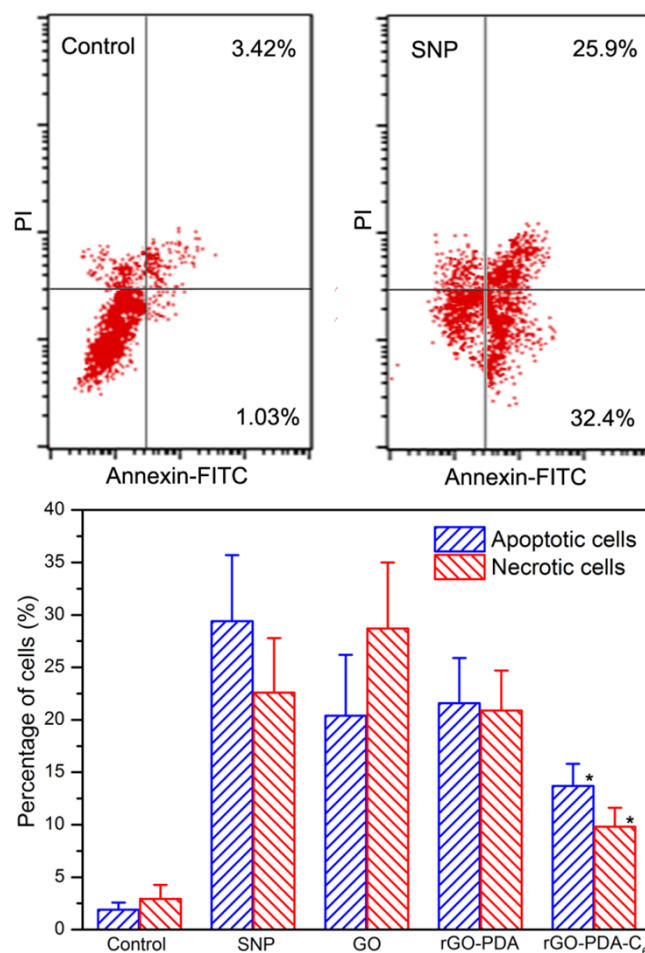

**Fig. S4** rGO-PDA-C<sub>60</sub> prevents NO-mediated apoptosis. The figure showed representative flow cytometric histograms of (a) untreated cells and (b) cells exposed to 1 mM SNP. (c) PC12 cells were incubated with 1 mM SNP for 24 h in the absence or presence of 50  $\mu$ g/mL nanocarbons. Apoptotic cell death was analyzed by double staining with annexin V-FITC and PI. Cells were incubated at 4  $^{\circ}$ C for 30 min in the dark with annexin V- FITC and PI, then were analyzed on a FACS Vantage SE flow cytometer (Becton Dickinson). Data were presented as mean  $\pm$  S.D. (n=3). \*p < 0.05 compared to the group treated with SNP only.
